# Supplementary material for: Comparing Proteolytic Fingerprints of Antigen-Presenting Cells during Allergen Processing
Source: MDPI journal article supplement (doi:10.3390/ijms18061225), 2017-06-08
Supplement: s1 [file s1]

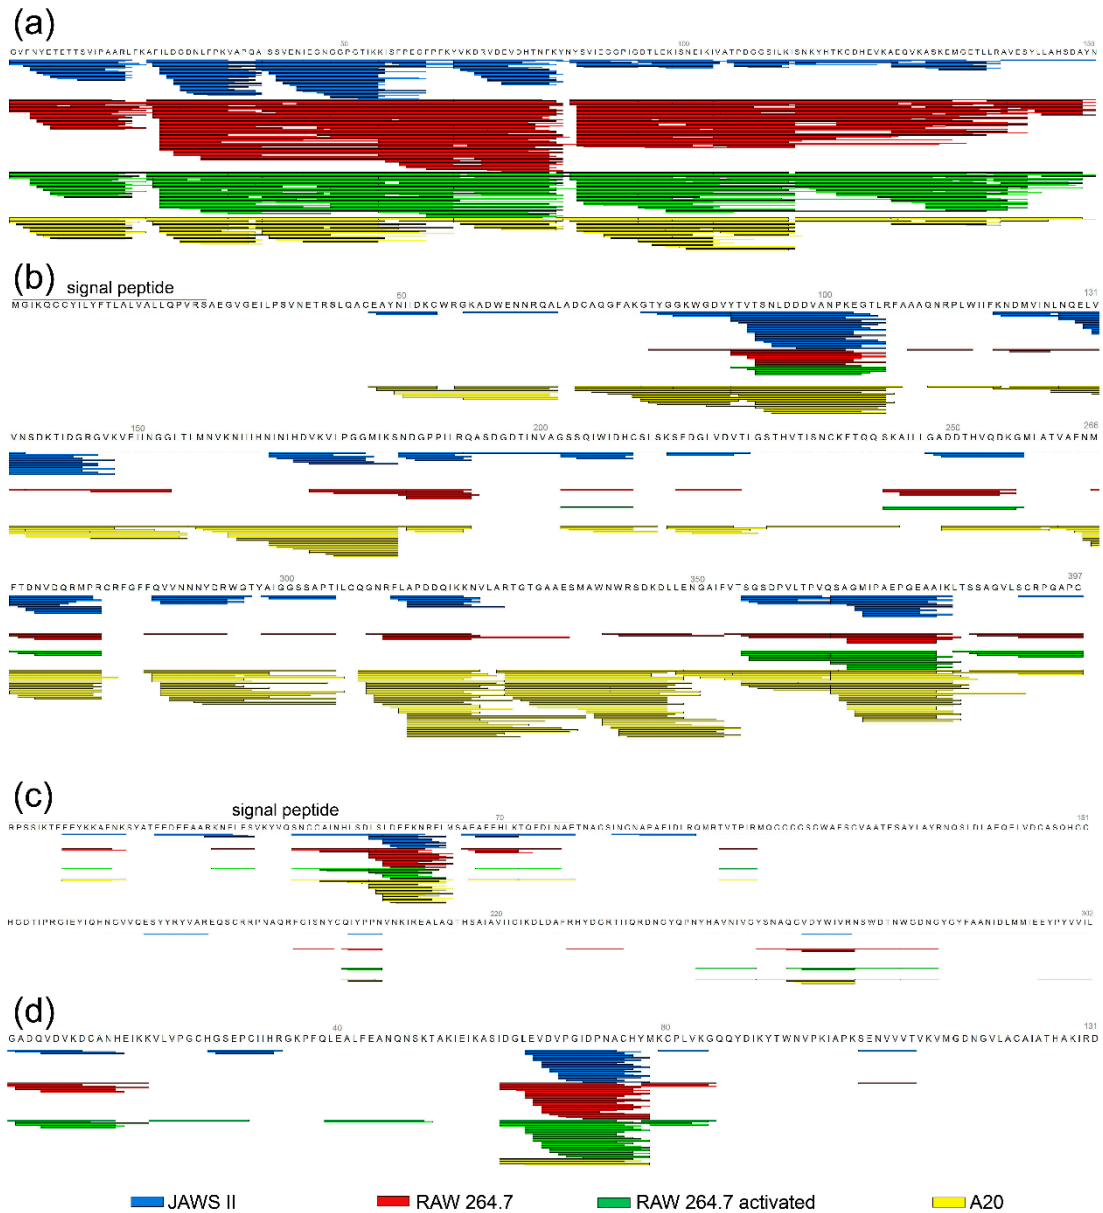

**Figure S1.** Endolysosomal degradations of purified allergens were analyzed by mass spectrometry (MS) after 24 h. Peptides identified by MS are represented as bars. The following protein sequences were used: Bet v 1.0101 (a); Amb a 1.0301 (b); proDer p 1.0102 (c); and Der p 2.0103 (d).
